# Supplementary material
Source: publisher site journal article supplement (https://www.dovepress.com/article/417180)
Supplement: Supplementary file 1 [file get_supplementary_file.php]

## Supplementary Figure 1. Example of calculation of PDC and MPR


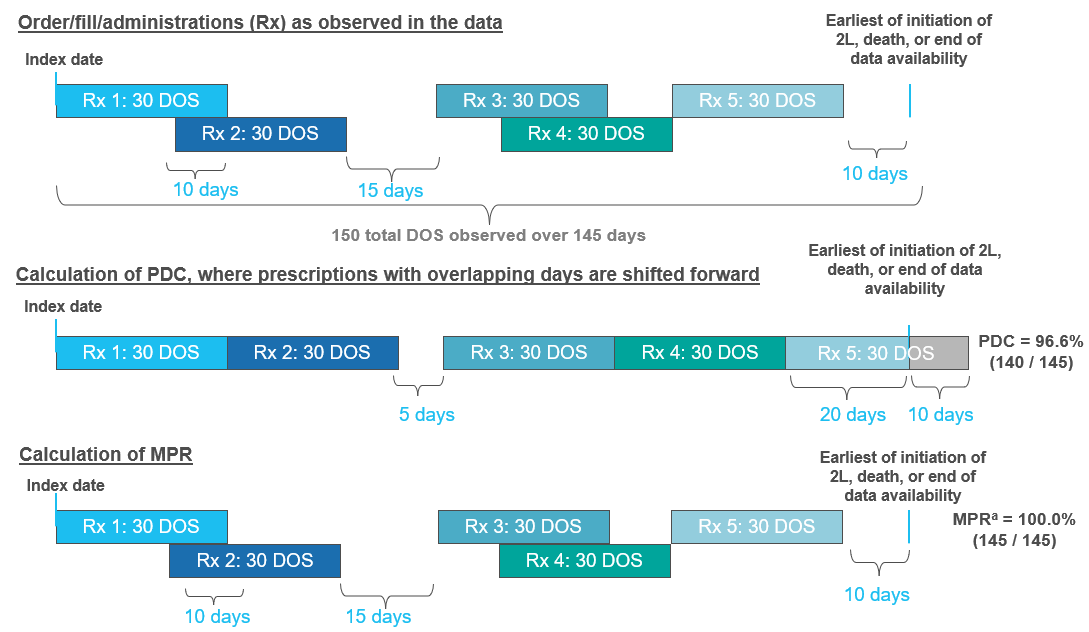


**Abbreviations:** 2L: second line; DOS: days of supply; MPR: medication possession ratio; PDC: proportion of days covered.

**Note:**

1. MPR capped at 100%.
